# Supplementary material for: miR169q and NUCLEAR FACTOR YA8 enhance salt tolerance by activating PEROXIDASE1 expression in response to ROS
Source: PubMed Central journal article supplement — Plant Physiol. 2021 Oct 29;188(1):608–23. doi: 10.1093/plphys/kiab498 (PMC8774724; doi:10.1093/plphys/kiab498), 2021-10-29
Supplement: kiab498_supplementary_data.pdf [file kiab498_supplementary_data.pdf]

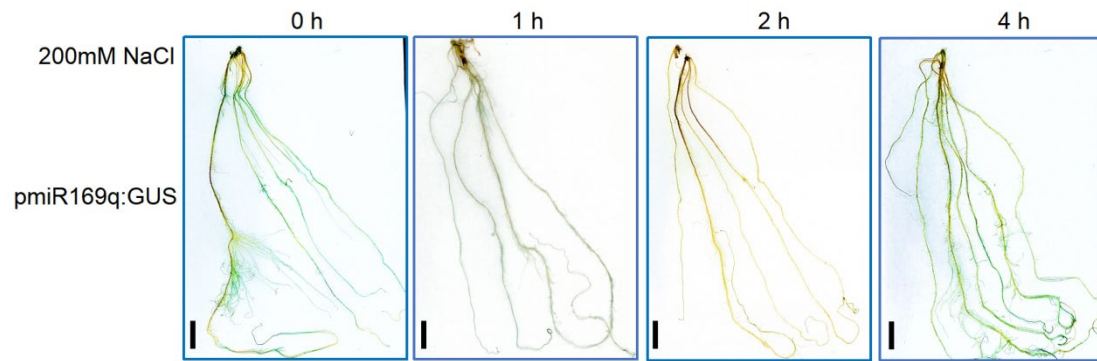

**Supplemental Figure S1. Salt stress rapidly reduces ZmmiR169q expression in maize roots.** Short-term high salinity induction (200 mM NaCl) assay of ZmmiR169q in the roots of *pmiR169q:GUS* transgenic plants assessed via histochemical staining. Strong GUS activity was observed in the *pmiR169q:GUS* root at 0 h, and GUS activity was reduced in the *pmiR169q:GUS* roots in response to salt stress. The GUS-staining assay of *pmiR169q:GUS* showed that the expression of ZmmiR169q was sharply reduced by 1 h of the high salinity treatment, and gradually increased after 4h, suggesting that ZmmiR169q might act as a responsive signal to salt stress. Bars = 1cm.

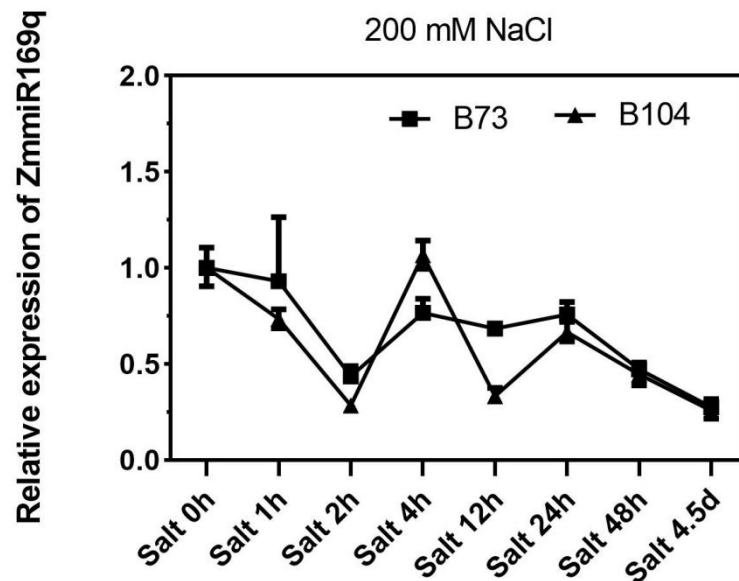

**Supplemental Figure S2. The expression profiles of ZmmiR169q in B73 and B104 under 200 mM NaCl treatment.** Short-term and long-term high salinity induction (200 mM NaCl) assay of ZmmiR169q in the roots of B73 and B104 assessed via RT-qCR. The results showed that the expression of ZmmiR169q in both B73 and B104 decreased and fluctuated slightly when the seedlings were treated under 200 mM NaCl from 1h to 24h, then declined gradually till 4.5d after salt treatment. In addition, ZmmiR169q expression patterns under salt are the same in both B73 and B104. Values are means  $\pm$  SD, n=3.

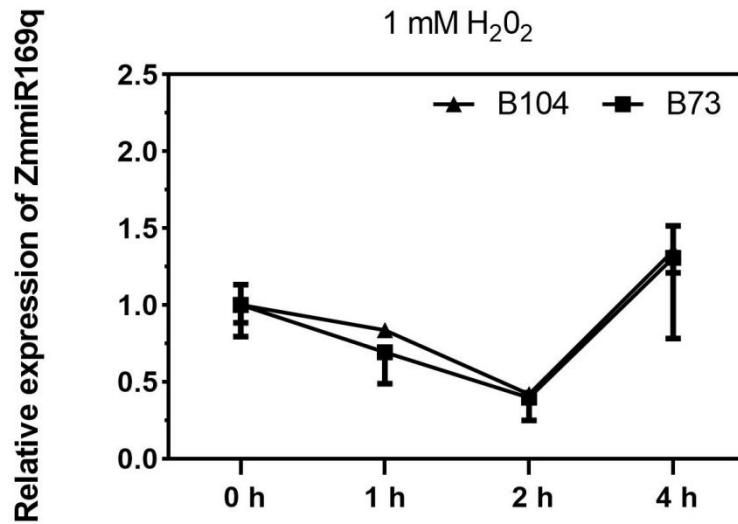

**Supplemental Figure S3. The expression profiles of ZmmiR169q in B73 and B104 under 1 mM H<sub>2</sub>O<sub>2</sub> treatment.** Short-term oxidation stress response (1 mM H<sub>2</sub>O<sub>2</sub>) assay of ZmmiR169q in the roots of B73 and B104 assessed via RT-qPCR. ZmmiR169q expression patterns under 1 mM H<sub>2</sub>O<sub>2</sub> treatment are the same in both B73 and B104. Values are means  $\pm$  SD, n=3.

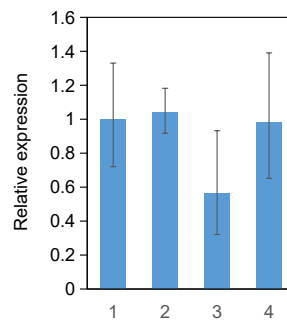

**Supplemental Figure S4. Coexpression of zmmiR169q and ZmNF-YA8 gene in a transient expression system in *Nicotiana benthamiana* cells.** Values are means  $\pm$  SD, n=3. Student's t-test, \* P<0.05.

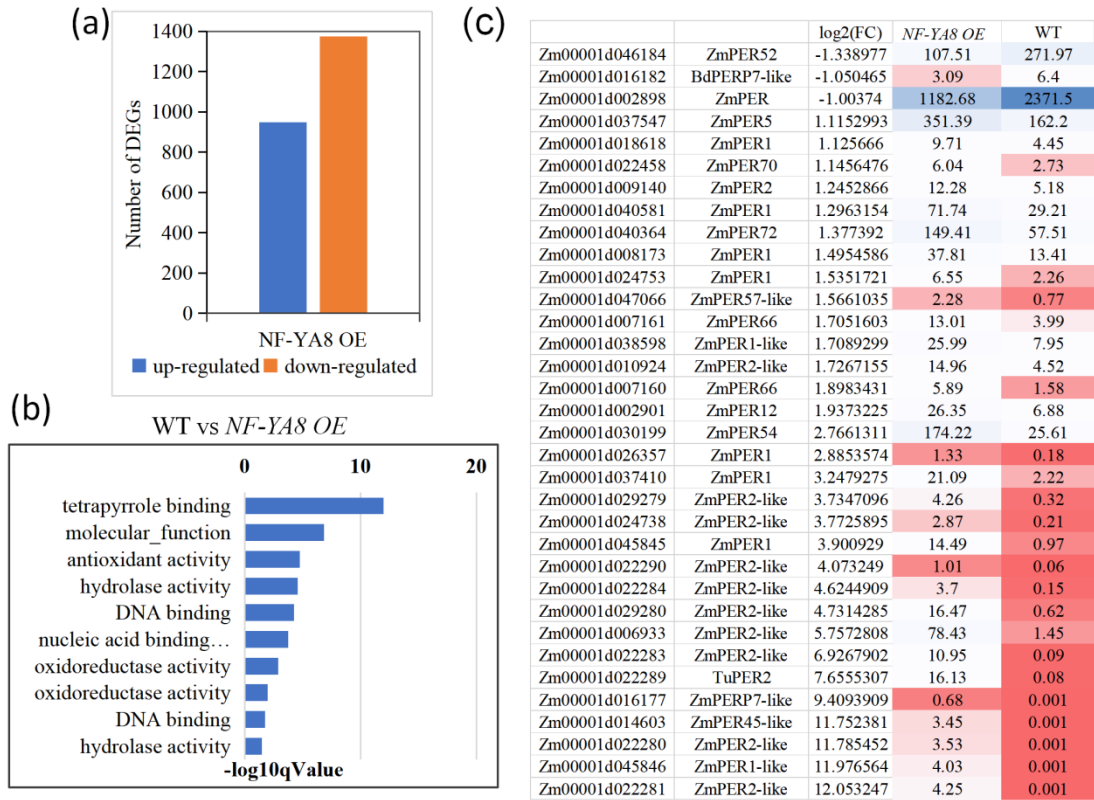

**Supplemental Figure S5. *ZmNF-YA8* was involved in antioxidant pathway.** (a) The number of genes differentially expressed in the different transgenic line compared with WT. (b) Gene ontology (GO) enrichment analysis of DEGs in the molecular function GO term. (c) Heatmap illustrating DEGs between *NF-YA8 OE* and WT related to oxidative stress and antioxidant pathway.

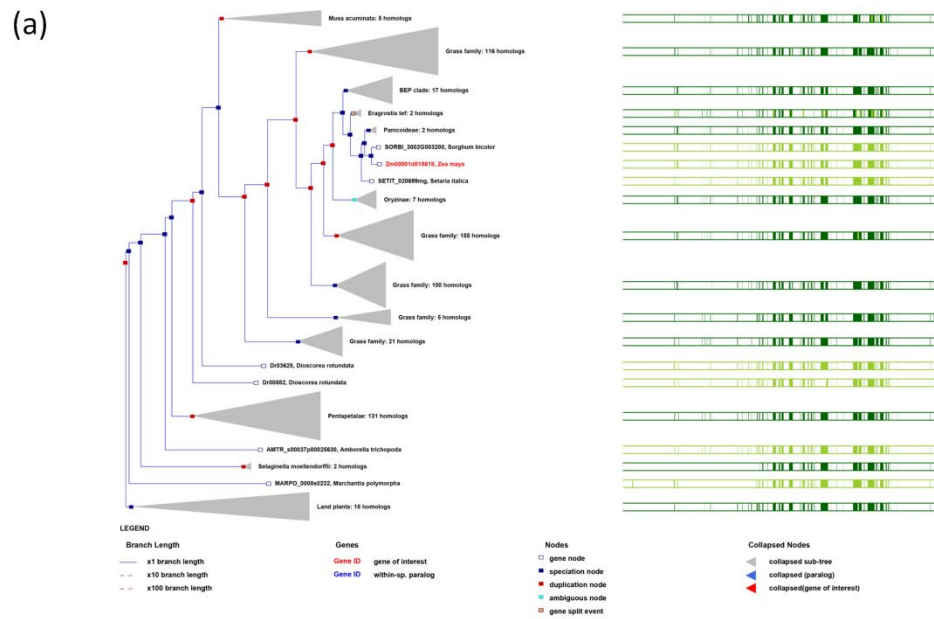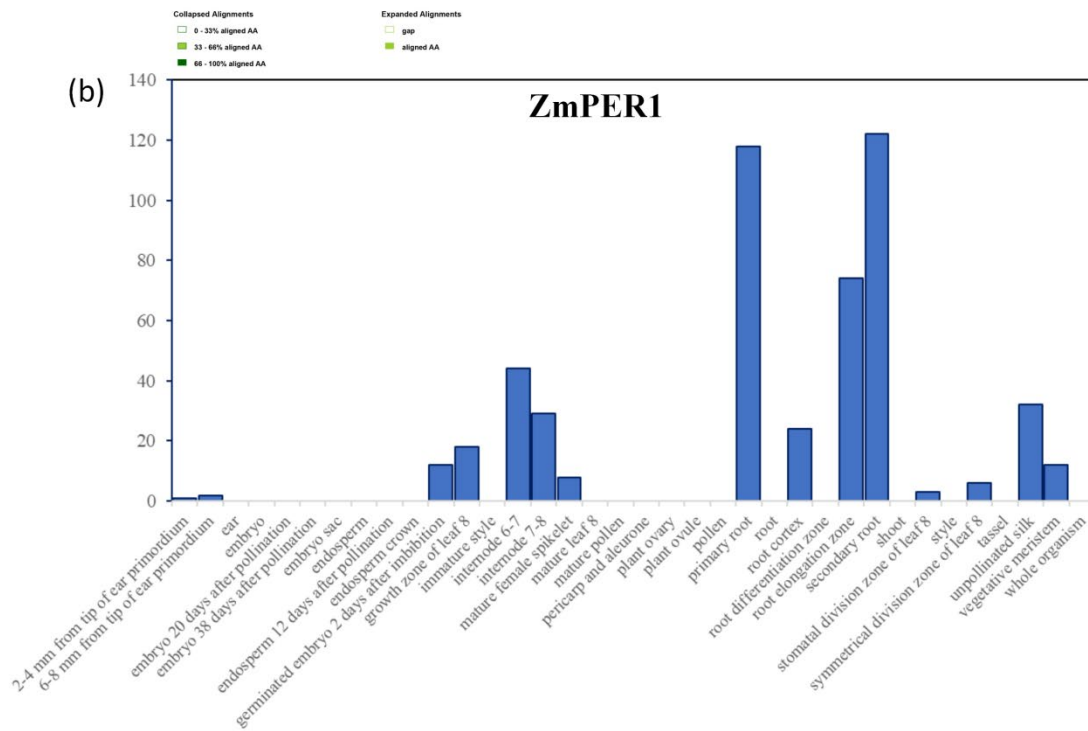

**Supplemental Figure S6. Gene tree of *Zm0001d018618* and expression profiles in different tissues.** (a) *Zm0001d018618* shares the highest similarity to the orthologue of sorghum. (b) *Zm0001d018618* preferentially expresses in root tissues.

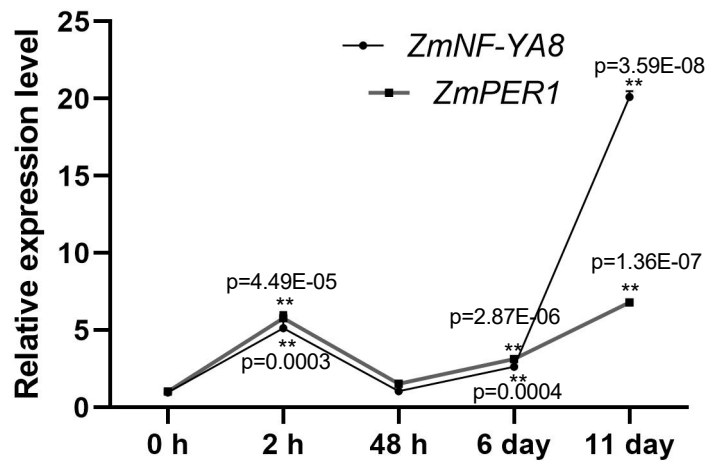

**Supplemental Figure S7. Expression profiles of *ZmNF-YA8* and *ZmPER1* in root of B104 under 200 mM NaCl treatment.** Values are means  $\pm$  SD, n=3. Asterisks denote a statistically significant difference from the wild-type, Student's t-test, \*\* P<0.01.

Partial sequence of 3' UTR of *ZmNF-YA8*

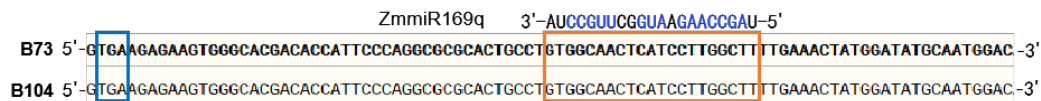

**Supplemental Figure S8. Alignment of ZmmiR169q target sites in the 3' UTR of *ZmNF-YA8* between B73 and B104**

**Supplemental Table S1. Mapping ratio of reference genome**

| Sample     | Total reads | Unmapped reads   | Unique mapped reads | Multiple mapped reads | Mapping ratio |
|------------|-------------|------------------|---------------------|-----------------------|---------------|
| NF-YA8 OE  | 28873258    | 5262193 (18.23%) | 23290919 (80.67%)   | 320146 (1.11%)        | 81.77%        |
| WT         | 31871210    | 8589031 (26.95%) | 22983385 (72.11%)   | 298794 (0.94%)        | 73.05%        |
| miR169q OE | 23827196    | 6634399 (27.84%) | 16966517 (71.21%)   | 226280 (0.95%)        | 72.16%        |

**Supplemental Table S2. List of primers used in this study**

| Name               | Sequence 5' -3'                                              |
|--------------------|--------------------------------------------------------------|
| P-miR169q-F        | GTGTAGGGAGGTAAAGGTGC                                         |
| P-miR169q-R        | GGGAGATAGGCTCCTCATCT                                         |
| P-YA8-F            | AAACTGATGTAATAATGCGT                                         |
| P-YA8-R            | TATCTCCTTCCTCTCCCCTTC                                        |
| Zma-miR169q-qPCR-F | GTAGCCAAGAATGGCTTGCCCT                                       |
| Pri-miR169q-F      | GCTCAATGCTTGCCCTGAAGC                                        |
| Zma-miR169q-qPCR-F | GTAGCCAAGAATGGCTTGCCCT                                       |
| Zm-NFYA8-qPCR-F    | GCCTGTGGCAACTCATCCTT                                         |
| Zm-NFYA8-qPCR-R    | GGTCATGTTTCGATGGCTTCAC                                       |
| Zm-PER1-qPCR-F     | CGCTGCTCGCTCTCATCCA                                          |
| Zm-PER1-qPCR-R     | TTCATGTCCAGCCCAGCTGC                                         |
| U6-FW              | GGAGACATCCGATAAAAATTGG                                       |
| U6-RW              | GGACCATTCTCGATTGTGC                                          |
| ZmActin1-F         | ATGTTTCCTGGGATTGCCGAT                                        |
| ZmActin1-R         | CCAGTTTCGTCATACTCTCCCTTG                                     |
| AD-Zm-NFYA8        | CGAAGAAGTCCAAAGCTTCTG                                        |
| AD-Zm-NFYA8-Arm-F  | GTACCAGATTACGCTCATATGATGTGCCCTTTTACG                         |
| AD-Zm-NFYA8-Arm-R  | CTACGATTATCTGCAGCTCGAGCCTTATGGTG                             |
| 3C1F               | AGCTTTGACTGATTGGGTAGAGTGACTGATTGGGTAGAGTGACTGATTGGGTAGAGC    |
| 3C1R               | TCGAGCTCTACCAATCAGTCACTCTACCAATCAGTCACTCTACCAATCAGTCAA       |
| 3C2F               | AGCTTTGGGACCAATGCAGCATTGGGACCAATGCAGCATTGGGACCAATGCAGCAC     |
| 3C2R               | TCGAGTGCTGCATTGGTCCCAATGCTGCATTGGTCCCAATGCTGCATTGGTCCCAAA    |
| 3C3F               | AGCTTAGAAGTATTGGATGTTAAGAAGTATTGGATGTTAAGAAGTATTGGATGTTAC    |
| 3C3R               | TCGAGTAACATCCAATACTTCTTAACATCCAATACTTCTTAACATCCAATACTTCTA    |
| 3C4F               | AGCTTCTTTAGCCAATTGTGTTCTTTAGCCAATTGTGTTCTTTAGCCAATTGTGTTTC   |
| 3C4R               | TCGAGAACAACAATTGGCTAAAGAACAACAATTGGCTAAAGAACAACAATTGGCTAAAGA |
| 3C5F               | AGCTTGATGAACCAATATAAAGATGAACCAATATAAAGATGAACCAATATAAAGAT     |
| 3C5R               | TCGAGTTTTATATTGGTTCATCTTTATATTGGTTCATCTTTATATTGGTTCATCA      |
| 3C2mF              | AGCTTTGGGACTAGTTGCAGCATTGGGACTAGTTGCAGCATTGGGACTAGTTGCAGCAC  |

|                   |                                                          |
|-------------------|----------------------------------------------------------|
| 3C2mR             | TCGAGTGCTGCAACTAGCCCAATGCTGCTAGTCCCAATGCTGCTAGTCCCAAA    |
| 3C4m-F            | AGCTTCTTTAGCTAGTTGTGTCTTTAGCTAGTTGTGTCTTTAGCTAGTTGTGTTC  |
| 3C4m-R            | TCGAGAACAACAAGCTAAAGAACAACAAGCTAAAGAACAACAAGCTAAAGA      |
| 3C5m-F            | AGCTTGATGAAGTATATAAAGATGAAGTATATAAAGATGAAGTATATAAAG      |
| 3C5m-R            | TCGAGTTTATACTAGTTCATCTTTTATACTAGTTCATCTTTTATACTAGTTCATCA |
| pabai-c-F         | CAAGGAAACCGAAATCAAA                                      |
| pabai-c-R         | CATACAGAGCACATGCCTCG                                     |
| P1F               | GTTATGTTAGTTGCACGCAGC                                    |
| P1R               | GGAATGGATCGGATACGATGC                                    |
| P1_LUC_ARM-F      | gggccccccctcgaggtcgacGTTATGTTAGTTGCACGCAGC               |
| P1_LUC_ARM-R      | cgctctagaactagtgatccGGAATGGATCGGATACGATGC                |
| P2F               | CTAGACAAGAGTTCAGTTCAG                                    |
| P2_LUC_ARM-F      | gggccccccctcgaggtcgacCTAGACAAGAGTTCAGTTCAG               |
| P3_LUC_ARM-R      | cgctctagaactagtgatccCTACTGAACTCTTGTCTAG                  |
| P4_LUC_ARM-R      | cgctctagaactagtgatccCATAGCTGCCATCATCAGATC                |
| 62SK-F            | cgcaagacccttcctc                                         |
| 62SK-R            | aaccctaatttccttatcgg                                     |
| 62SK_NF-YA8_ARM-F | cgctctagaactagtgatccATGTGCCTTTTACGGGAAATG                |
| 62SK_NF-YA8_ARM-R | ggtaccgggccccccctcgagTCACCTTATGGTGAAACACGC               |
| Zm-PER1-ChIP-F    | GCAATGAACTTTAGCCAATTGTG                                  |
| Zm-PER1-ChIP-R    | CAGTAACTAATTAGTCGTCATGC                                  |
| Zm-GH3-ChIP-F     | GTTCTGGACCCAGATTGGTCAGG                                  |
| Zm-GH3-ChIP-R     | AGGTAGCCAGGTCCACTGC                                      |
| Nt_actin_F        | TCCATGCTCAATGGGATACT                                     |
| Nt_actin_R        | TTCAACCCCTTGCTGTGTAT                                     |
